1 **Influenza virus replication in cardiomyocytes drives heart**  
2 **dysfunction and fibrosis**

3

4 Adam D. Kenney<sup>1,2</sup>, Stephanie L. Aron<sup>3</sup>, Clara Gilbert<sup>3</sup>, Naresh Kumar<sup>1</sup>, Peng Chen<sup>4</sup>, Adrian  
5 Eddy<sup>1,2</sup>, Lizhi Zhang<sup>1,2</sup>, Ashley Zani<sup>1,2</sup>, Nahara Vargas-Maldonado<sup>1</sup>, Samuel Speaks<sup>1</sup>, Jeffrey  
6 Kawahara<sup>1,2</sup>, Parker J. Denz<sup>1,2</sup>, Lisa Dorn<sup>4</sup>, Federica Accornero<sup>4</sup>, Jianjie Ma<sup>5</sup>, Hua Zhu<sup>5</sup>,  
7 Murugesan V.S. Rajaram<sup>1</sup>, Chuanxi Cai<sup>5</sup>, Ryan A. Langlois<sup>3</sup>, and Jacob S. Yount<sup>1,2\*</sup>

8

9 <sup>1</sup>Department of Microbial Infection and Immunity, The Ohio State University, Columbus, OH,  
10 USA

11 <sup>2</sup>Infectious Diseases Institute, Viruses and Emerging Pathogens Program, The Ohio State  
12 University, Columbus, OH, USA

13 <sup>3</sup>Department of Microbiology and Immunology, The University of Minnesota, Minneapolis, MN,  
14 USA

15 <sup>4</sup>Department of Physiology and Cell Biology, The Ohio State University, Columbus, OH, USA

16 <sup>5</sup>Department of Surgery, The Ohio State University, Columbus, OH, USA

17

18

19 \*Address correspondence to [Jacob.Yount@osumc.edu](mailto:Jacob.Yount@osumc.edu)

20

21

22

23

24

25

26 **Abstract**

27           Cardiac dysfunction is a common extrapulmonary complication of severe influenza virus  
28 infection. Prevailing models propose that influenza-associated heart dysfunction is indirectly  
29 triggered by cytokine mediated cardiotoxicity downstream of the inflamed lung, rather than by  
30 direct infection of cardiac tissue. To test the etiology of cardiac dysfunction resulting from  
31 influenza virus infection, we generated a novel recombinant H1N1 influenza A virus that was  
32 attenuated in cardiomyocytes by incorporation of target sequences for miRNAs expressed  
33 specifically in that cell type (miR133b and miR206). Compared with control virus, mice infected  
34 with the miR-targeted virus had significantly reduced heart viral titers, confirming cardiac  
35 attenuation of viral replication. The miR-targeted virus, however, was fully replicative and  
36 inflammatory in lungs when compared to control virus, and induced similar systemic weight loss.  
37 The miR-targeted virus induced considerably lower levels of cardiac arrhythmia, fibrosis, and  
38 inflammation, compared with control virus, in mice lacking interferon induced transmembrane  
39 protein 3 (IFITM3), which serve as the only available model for severe influenza-associated  
40 cardiac pathology. We conclude that robust replication of virus in the heart is required for  
41 pathology even when lung inflammation is severe. Indeed, we show that human stem cell-  
42 derived cardiomyocytes are susceptible to influenza virus infection. This work establishes a  
43 fundamental new paradigm in which influenza virus damages the heart through direct infection  
44 of cardiomyocytes.

45

46

47

48

49

50

## 51 **Introduction**

52           Seasonal influenza virus remains a major contributor to human mortality, and the  
53 potential for emergence of new pandemic strains is an ever-present worldwide concern<sup>1-3</sup>. In  
54 addition to the lung damage traditionally associated with these infections, influenza virus can  
55 also cause or exacerbate cardiac dysfunction<sup>4-10</sup>. Ample evidence exists for the role of cardiac  
56 dysfunction in influenza-associated morbidity and mortality, including: (i) myocarditis is observed  
57 in a significant portion of hospitalized influenza patients<sup>11-13</sup>, (ii) heart damage at autopsy has  
58 been reported for fatal seasonal influenza cases<sup>13-16</sup>, (iii) severe cardiac damage was described  
59 in nearly all patients who died from infection with the 1918 pandemic influenza virus<sup>17</sup>, and (iv)  
60 cardiac events increase annually during flu season, especially among the unvaccinated<sup>18,19</sup>.  
61 Despite the implications for public health, little is known about the underlying mechanisms by  
62 which influenza virus causes heart pathology<sup>11-16</sup>.

63           Indeed, there is a debate within the clinical literature as to whether influenza virus  
64 directly or indirectly causes cardiac complications<sup>6-11</sup>. Although live virus has been detected in  
65 human and non-human primate heart samples, direct infection of the heart has rarely been  
66 investigated<sup>20-24</sup>. Instead, current dogma states that severely infected lungs produce a cytokine  
67 storm with systemic cardiotoxic inflammation, which indirectly drives cardiac dysfunction<sup>6-11,25</sup>.  
68 Attempts to resolve this fundamental question have been hindered by the lack of tractable  
69 animal model systems for influenza-mediated cardiac pathology<sup>26,27</sup>.

70           Laboratory mouse strains generally show minimal cardiac dysfunction upon influenza  
71 virus infection, even with high doses of virus<sup>26-28</sup>. Overcoming this obstacle, we recently reported  
72 that mice lacking the interferon-induced transmembrane protein 3 (IFITM3) suffer from severe  
73 cardiac electrical dysfunction and fibrosis upon influenza virus infection, thus providing a long-  
74 sought model for influenza-associated cardiac complications<sup>29</sup>. IFITM3 is a protein involved in  
75 innate immunity that blocks the fusion of viruses with cell membranes, and deficiencies in

76 IFITM3 are among the only known genetic risk factors in humans for developing severe  
77 influenza<sup>30-36</sup>. We observed that severe influenza virus-induced cardiac pathology in IFITM3 KO  
78 mice correlates with drastically increased and sustained viral loads in heart tissue when  
79 compared with rapid virus clearance in WT mice<sup>29</sup>. These results suggested a direct role for  
80 influenza virus replication in the heart in driving cardiac dysfunction, but the observed cardiac  
81 phenomena could not be decoupled from the severely heightened lung infection and  
82 inflammation that also occurs in IFITM3 KO mice<sup>29,32,37</sup>.

83         Here we sought to address the fundamental question of whether severe lung infection is  
84 sufficient to drive influenza-associated cardiac dysfunction, or whether replication in heart cells  
85 is required. We designed, rescued, and validated a recombinant influenza virus that is  
86 attenuated for replication in cardiomyocytes while being fully replication-competent and  
87 inflammatory in the lungs. Using this novel tool, we find that severe lung inflammation during  
88 influenza virus infection, even in highly infected IFITM3 KO mice, is not sufficient to drive  
89 cardiac dysfunction in the absence of virus replication in cardiomyocytes. Thus, direct infection  
90 and replication of influenza virus in cardiomyocytes is a primary determinant of cardiac  
91 pathology associated with severe influenza.

92

## 93 **Results**

### 94 **Generation of influenza virus with cardiomyocyte-specific attenuation**

95 Influenza virus strain A/Puerto Rico/8/1934 (H1N1), commonly known as PR8, is a pathogenic  
96 mouse-adapted virus that we previously showed disseminates from the lungs to the hearts of  
97 WT and IFITM3 KO mice<sup>29</sup>. As such, we chose this virus for a heart-specific attenuation  
98 strategy. Using reverse genetics techniques, we inserted into the influenza virus nucleoprotein  
99 (NP) gene segment, two copies each of target sequences for miR133b and miR206, two  
100 miRNAs that are expressed specifically in muscle cells, including cardiomyocytes (Fig 1A)<sup>38-44</sup>.

101 Following miRNA target site insertions, we added a duplicated NP packaging sequence flanking  
102 the inserted target sequence. We rescued this novel recombinant virus in cell culture, and  
103 herein refer to it as PR8-miR133b/206. A control virus (PR8-miRctrl) containing a length-  
104 matched non-targeted sequence was described previously (Fig 1A)<sup>38</sup>. Both engineered viruses  
105 grew to similar high titers ( $>10^7$  TCID50/mL) in embryonated chicken eggs, indicating that  
106 relative replicative capacities of the engineered viruses were unaffected in the absence of  
107 specific miRNA targeting.

108 To validate that PR8-miR133b/206 is attenuated in cells expressing the relevant  
109 miRNAs, we infected a mouse myoblast cell line known as C2C12. Compared to the control  
110 virus, PR8-miR133b/206 was significantly attenuated in C2C12 cells, suggesting that targeting  
111 by miRNAs 133b and 206 potentially restricts infection of myoblasts (Fig 1B). As a control, we  
112 observed no significant difference in infection by the two viruses in human HEK293T cells which  
113 do not express murine miR133b/206 (Fig 1C). Overall, we established PR8-miR133b/206 as an  
114 infectious, replication-competent virus that is attenuated in myocyte-like cells.

115

### 116 **Cardiomyocyte-specific miRNA-targeting of influenza virus prolongs survival of IFITM3** 117 **KO mice**

118 To measure the overall pathogenicity of PR8-miR133b/206 compared to control virus, we  
119 infected WT and IFITM3 KO mice, and tracked their weight loss and survival. Consistent with  
120 enhanced disease severity in IFITM3 KO mice, the KO animals lost significantly more weight  
121 than WT mice in infections with both viruses (Fig 2A). Comparing the viruses within the  
122 individual mouse genotypes, we found that miR133b/206 targeting did not significantly alter the  
123 ability of influenza virus to induce weight loss (Fig 2A). Since weight loss during influenza virus  
124 infection is generally driven by cytokine-induced inappetence<sup>45-47</sup>, these data suggest similar  
125 levels of lung-derived inflammation were induced by the two viruses (examined below).

126 Similarly, all WT mice recovered from infections with either virus strain, while both  
127 infections were lethal in IFITM3 KO mice (Fig 2B). Despite similar weight loss in IFITM3 KO  
128 mice, infection with PR8-miR133b/206 resulted in a modest, statistically significant benefit in  
129 terms of survival as compared to infection with PR8-miRcontrol (median survival times of 10 d  
130 for PR8-miRctrl versus 12 d for PR8-miR-133b/206) (Fig 2B). These data suggest that viral  
131 replication in cardiomyocytes may contribute to more rapid lethality in IFITM3 KO mice, but, not  
132 surprisingly, that cardiomyocyte infection is not the sole cause of death. Overall, these outcome  
133 data are consistent with the premise that our recombinant viruses can decouple the impact of  
134 lung inflammation from the development of influenza-associated cardiac dysfunction.

135

#### 136 **PR8-miR133b/206 is specifically attenuated in the heart *in vivo***

137 To further validate the utility of our engineered viruses in dissecting determinants for cardiac  
138 dysfunction, we first examined viral loads and lung inflammation after infection by PR8-miR-  
139 133b/206 and PR8-miRctrl. As shown in Fig. 3A, lung replication of PR8-miR133b/206 was  
140 comparable to that of PR8-miRctrl at both day 5 and day 10 post infection in WT mice. As  
141 expected, viral titers were higher in IFITM3 KO mice than WT mice (Fig 3A), but again were  
142 similar in the lungs when comparing PR8-miRctrl versus PR8-miR133b/206 (Fig 3A). To further  
143 confirm that PR8-miR133b/206 lung infections were not attenuated, we measured IFN $\beta$  and IL-6  
144 levels, and found no significant difference for these proinflammatory cytokines in the lungs of  
145 mice infected by control or miR-targeted virus (Fig 3B,C). We also observed that IFITM3 KO  
146 mice, as expected, showed more severe histopathology than WT mice (Fig 3D). Indeed, both  
147 viruses induced cellular consolidation of the airways at indistinguishable levels (Fig 3E).  
148 Coupled with outcome data, the comparable lung pathology and inflammation demonstrate that  
149 the novel PR8-miR133b/206 virus is not attenuated in the lungs.

150           Given the inclusion of muscle/cardiomyocyte-specific miRNA targeting sequences, we  
151 predicted that PR8-miR133b/206 infections would be attenuated in cardiac tissues. To test this  
152 prediction, we quantified virus titers in the same experimental mice used to derive the data from  
153 lungs (5 and 10 d post infection). As expected for PR8-miRctrl, we observed primarily low or  
154 undetectable viral titers in WT mouse hearts, and significantly higher titers in the cardiac tissue  
155 from IFITM3 KO mice at both timepoints (Fig 4A). In PR8-miR133b/206 samples, live virus was  
156 undetectable in WT hearts, and the mean titers were significantly lower in IFITM3 KO hearts  
157 compared to control virus, confirming overall attenuation of replication in the heart for the miR-  
158 targeted virus (Fig 4A). Cardiomyocyte-specific attenuation of the virus via miR targeting  
159 revealed an important role for the direct infection of cardiomyocytes in influenza-associated  
160 cardiac inflammation, as manifested in IFITM3 KO mice by: (i) a roughly 1-1.5 log decrease in  
161 mean cardiac viral titers, (ii) markedly reduced levels of inflammatory cytokines IFN $\beta$  and IL-6  
162 (Fig 4B,C), and (iii) attenuated CD45-positive immune cell infiltration (Fig 3D,E).

163           Overall, we have established a controlled experimental system to interrogate roles of  
164 lung inflammation versus direct cardiac infection in influenza-associated cardiac dysfunction.  
165 Namely, IFITM3 KO mice infected with PR8-miRctrl or PR8-miR133b/206 allow direct  
166 comparison of heart phenotypes in animals with equivalently severe lung infections, but with or  
167 without high virus replication in the heart.

168

### 169 **Virus replication in the heart is required for robust induction of cardiac fibrosis and** 170 **electrical dysfunction**

171 Fibrosis is a broadly observed consequence of severe infectious insults to cardiac tissue in  
172 humans. Because IFITM3 KO mice exhibit significant cardiac fibrosis following infection with  
173 influenza virus<sup>29</sup>, and because lung inflammation is not attenuated for our heart-attenuated  
174 virus, we could test for the first time whether cardiac pathology results directly from heart

175 infection or is induced indirectly by severe lung inflammation. We thus collected hearts from WT  
176 and IFITM3 KO mice at day 10 post-infection, and first performed histological analysis of fibrosis  
177 using Masson's Trichrome staining. Examination of heart sections revealed blue-stained fibrotic  
178 lesions that were most apparent in hearts from IFITM3 KO mice infected with PR8-miRctrl (Fig  
179 5A). Indeed, fibrotic lesions in WT samples and those from IFITM3 KO mice infected with PR8-  
180 miR133b/206 were minimal (Fig 5A). Quantitative analysis of images from multiple mice  
181 confirmed that fibrotic staining in heart samples from IFITM3 KO mice infected with miR-  
182 targeted virus was significantly decreased compared to infection with miRctrl virus (Fig 5B).  
183 Thus, attenuation of virus replication in the heart correlates with less cardiac fibrosis following  
184 infection, indicating that direct virus replication in cardiomyocytes is required for development of  
185 influenza-associated cardiac fibrosis.

186         Given that cardiac fibrosis is a well-established risk-factor for cardiac arrhythmia<sup>48,49</sup>, and  
187 that fibrosis was significantly decreased in infection with PR8-miR133b/206 (Fig 5), we tested  
188 whether cardiac electrical dysfunction induced by influenza virus similarly requires direct  
189 infection of cardiomyocytes. We performed electrocardiogram (ECG) measurements on WT and  
190 IFITM3 KO mice before infection and at several timepoints after infection with PR8-miRctrl or  
191 PR8-miR133b/206. While cardiac function in WT mice was largely unchanged throughout  
192 infection, IFITM3 KO mice showed depressed heart rates and increased RR (interbeat) interval  
193 averages during the course of infection with PR8-miRctrl (Fig 6A). We also observed irregular  
194 ECG tracings in these KO animals infected with PR8-miRctrl, indicative of an abnormally  
195 arrhythmic heartbeat (Fig 6B). Remarkably, an arrhythmic phenotype was largely absent in the  
196 majority of IFITM3 KO mice infected with PR8-miR133b/206 (Fig 6C). Specifically, RR interval  
197 ranges (defined as the longest RR interval minus the shortest RR interval)<sup>29</sup> calculated from the  
198 entirety of our ECG readings in multiple mice were significantly lower in KO mice infected with  
199 PR8-miR133b/206 compared to PR8miR-ctrl. Importantly, these latter data indicate an



200 attenuation of pathological arrhythmic heart dysfunction when virus replication in the heart was  
201 decreased (Fig 6C). Overall, the attenuation in heart viral titers observed for infections with  
202 PR8-miR133b/206 is accompanied by decreased cardiac electrical dysfunction, despite the  
203 robust virus replication and inflammation in the lungs. We conclude that influenza-associated  
204 cardiac fibrosis and electrical dysfunction requires direct virus replication in the heart.

205

### 206 **Rat and human cardiomyocytes are susceptible to influenza virus infection**

207 To date, direct infection of mammalian cardiac cells by influenza virus has been rarely  
208 investigated, but would provide important support for an infection-dysfunction link in pathology.  
209 To confirm that primary rodent cardiomyocytes are permissive to influenza virus infection, we  
210 purified rat neonatal cardiomyocytes and infected these cells for 24 h with increasing MOIs of  
211 PR8 expressing GFP (PR8-GFP). As shown in Fig. 7A, imaging of GFP fluorescence revealed  
212 that the cardiomyocytes were infected by influenza virus (Fig 7A). We next tested whether  
213 human cardiomyocytes are able to be infected. For this, we utilized human induced pluripotent  
214 stem cell-derived cardiomyocytes, derived from two independent sources and culture methods.  
215 Similarly to the rat cells, we readily visualized PR8-GFP infection of Fujifilm iCell  
216 cardiomyocytes, as indicated by GFP expression at 24 h post infection (Fig 7B). In addition,  
217 cardiomyocytes cultures differentiated in-house from human stem cells were infected by PR8-  
218 GFP at similarly high levels (Fig 7C). Notably, GFP-positive cardiomyocytes that were  
219 previously beating in these cultures ceased to beat by 48 h post infection (Supp Movie 1), while  
220 mock-infected wells continued to be populated by contractile cells (Supp Movie 2). At a  
221 mechanistic level, we found that influenza virus infection of the cardiomyocytes significantly  
222 increased cleaved caspase 3 levels, indicating activation of cell death pathways (Fig 7D,E).  
223 Taken together, we conclude from these experiments that cardiomyocytes are susceptible to  
224 direct influenza virus infection, which activates cardiomyocyte death pathways.

225

## 226 **Discussion**

227 Cardiac manifestations of influenza virus infection are widely attributed to severe lung  
228 inflammation, which contributes to systemic tissue damage and exacerbates pre-existing heart  
229 conditions<sup>50-52</sup>. However, given that we lack non-invasive clinical tests to identify direct heart  
230 infection by influenza virus in living humans, it has been difficult to determine the relative  
231 contributions of lung inflammation versus direct virus-induced damage to the heart in cardiac  
232 dysfunction during severe infection. To address this fundamental question, we turned to an  
233 animal model, specifically, IFITM3 KO mice, which serve as a severe infection model to study  
234 influenza-induced cardiac dysfunction<sup>29</sup>. IFITM3 alters membrane properties to disfavor virus-to-  
235 cell fusion<sup>53-57</sup>. IFITM3 KO mice thus experience increased cellular infection and spread in  
236 lungs, spleen, and heart<sup>29</sup>, organs that are naturally susceptible to infection in WT mice.  
237 Importantly, viremic infection of other organs, such as the brain, liver, or kidneys, is not  
238 observed in IFITM3 KO mice<sup>29</sup>, thus providing a severe infection model recapitulating the tissue-  
239 specific distribution of influenza virus dissemination. Further supporting its relevance in  
240 dissecting influenza pathologies, genetic deficiencies in IFITM3 associate with susceptibility to  
241 severe disease in humans<sup>30-36</sup>.

242 To manipulate the ability of influenza virus to replicate in cardiomyocytes, we generated  
243 a novel recombinant virus strain with cardiomyocyte-specific miRNA target sites. We found that  
244 insertion of microRNA target sites for miR133b and 206 into the NP genome segment of IAV  
245 strain PR8 effectively attenuated infection specifically in murine myocyte-like cells *in vitro* and in  
246 the heart *in vivo* (Fig 1, 4). The reduction of virus load in the heart correlated with less severe  
247 cardiac fibrosis, inflammation, and electrical dysfunction, though lung virus replication and  
248 inflammation remained robust and comparable to control virus (Fig 3-6). Thus, we identified that  
249 direct infection of heart cells is required for cardiac dysfunction during influenza virus infection.

250 Our findings overturn the notion that severe lung inflammation is sufficient for influenza-  
251 associated cardiac pathologies. Since cardiac complications of severe influenza are often seen  
252 in hospitalized patients<sup>11-13</sup>, our results may suggest that direct infection of the human heart is  
253 more common than currently appreciated.

254 Both cardiac fibrosis and cardiac electric dysfunction were reduced in IFITM3 KO mice  
255 infected with PR8-miR133b/206, despite retention of residual virus in the heart (Fig 4-6). These  
256 data suggest that a threshold of virus in heart tissue is tolerated without producing significant  
257 pathology. This notion is strengthened by the fact that WT mice often have low, quickly cleared,  
258 levels of virus in the heart at early timepoints post-infection, but rarely exhibit significant cardiac  
259 dysfunction<sup>27-29</sup>. Alternatively, infection of cell types in the heart, in addition to cardiomyocytes,  
260 may occur without major pathological outcomes. Importantly, however, we observed no  
261 protective advantage of reduced cardiac infection in IFITM3 KO mice in terms of weight loss  
262 (Fig 2A), a finding that underscores the severity of the lung infection experienced by IFITM3 KO  
263 mice.

264 Several key issues remain to be addressed by future approaches in dissecting cardiac  
265 pathogenesis of influenza virus. Of particular interest is the mechanism by which the virus  
266 spreads from the primary site of infection (respiratory tract/lungs) to the heart and how  
267 productive infection in the heart is achieved thereafter. Single cell analyses may prove useful for  
268 identifying cell subsets in the heart that are infected initially by influenza virus. Additionally, virus  
269 strain-specific differences influencing not only overall virulence, but also tissue tropism, may  
270 influence cardiac infection and pathology. Indeed, certain strains of influenza virus have been  
271 shown to preferentially infect upper vs lower respiratory tract and other sites of extrapulmonary  
272 tropism are noted for particular virus strains<sup>58-62</sup>. Identifying viral factors that influence cardiac  
273 infection could prove crucial for predicting and treating cardiac manifestations of both circulating  
274 and emerging viruses. Finally, there is much to be learned about the clinical role of cardiac

275 infection in humans, particularly in individuals with deleterious IFITM3 SNPs, who may have a  
276 greater risk for direct influenza virus infection of the heart and cardiac pathology. Overall,  
277 extrapulmonary manifestations of respiratory virus infections are increasingly appreciated as  
278 important aspects of disease that will require continued research. Understanding the direct and  
279 indirect effects of virus in extrapulmonary tissues, such as the direct effects of influenza virus on  
280 the heart as uncovered here, will be critical for combating these noncanonical disease  
281 pathologies.

282

## 283 **Materials and Methods**

### 284 *Virus generation, propagation and titering*

285 PR8-miRctrl and PR8-miR133b/206 were generated as previously described<sup>38-44</sup>. Briefly, two  
286 copies each of target sequences for miR133b and miR206, or a length-matched untargeted  
287 sequence, were cloned and ligated into the 3' UTR of the NP gene along with a duplicated 3' NP  
288 packaging sequence. The recombinant viruses with modified NP segments were rescued using  
289 reverse genetic techniques and plaque purified. PR8-GFP was previously described<sup>63,64</sup>.  
290 Viruses were propagated in 10-day-old embryonated chicken eggs (Charles River Laboratories)  
291 for 48 hours at 37°C and titered on MDCK cells. For determining organ titers, tissues were  
292 collected and homogenized in 500ul of PBS, flash-frozen, and stored at -80°C prior to titering  
293 on MDCK cells.

294

### 295 *Mouse infections*

296 Mice eight to 12 weeks of age were anesthetized with isoflurane (Henry Schein Animal Health)  
297 and intranasally infected with PR8-miRctrl or PR8-miR133b/206 (50 TCID<sub>50</sub>) in sterile saline.  
298 Mice were monitored daily for weight loss and morbidity, and sacrificed if weight loss exceeded

299 30% of starting body mass or other endpoint criteria (severe hunched posture, lack of  
300 ambulation) were met. All procedures were approved by the OSU IACUC.

301

302 *Cell lines, cell line infections, and flow cytometry*

303 C2C12, HEK-293T, and MDCK cells were grown in Dulbecco's Modified Eagle's Medium  
304 (DMEM) supplemented with 10% Equafetal bovine serum (FBS; Atlas Biologicals) at 37°C with  
305 5% CO<sub>2</sub> in a humidified incubator. C2C12 and HEK-293T cells were infected with PR8-miRctrl  
306 or PR8-miR133b/206 at an MOI of 1.0 for 24 hours. For determination of IAV-infection  
307 percentages via flow cytometry, cells were stained with anti-H1N1 IAV NP (BEI resources, clone  
308 4F2) and Alexa488- conjugated secondary antibody (Thermo Scientific). Flow cytometry was  
309 performed on a FACSCanto II flow cytometer (BD Biosciences) and analyzed using FlowJo  
310 software.

311

312 *Primary cardiomyocytes*

313 Rat neonatal cardiomyocytes were prepared as described previously<sup>65</sup>. Fujifilm iCell  
314 cardiomyocytes were purchased from FujiFilm Cellular Dynamics Inc. (FCDI) (cat# C1006) and  
315 cultured in hiPSC-CM plating medium (FCDI, Cat# M1001) for 2 d followed by maintenance  
316 medium (FCDI, cat# M1003) for 10 d. In-house differentiated primary cardiomyocytes were  
317 cultured as follows. Human iPSCs were purchased from Thermo Fisher (cat.# A18945,) and  
318 cultured on Matrigel-coated plates (Corning, cat# 356231) using StemFlex medium (Thermo  
319 Fisher, cat.# A3349401) as described previously<sup>66</sup>. Cardiac differentiation was initiated by using  
320 a small molecule-based protocol<sup>67</sup>. PSCs (passage 20–35) were cultured until 80%–90%  
321 confluence, and their medium was replaced with cardiac differentiation basal medium consisting  
322 of RPMI (Thermo Fisher cat# 11875119), B27 supplement minus insulin (Thermo Fisher, cat.#  
323 A1895601). For the first two days, the basal medium was supplemented with 9 μM CHIR-99021

324 (Selleckchem, cat# S2924). The medium was then replaced with cardiac differentiation basal  
325 medium plus 5  $\mu$ M IWR-1 (Sigma, cat# I0161). Differentiated cells were maintained in cardiac  
326 differentiation basal medium for 2 days, which was then replaced with cardiac proliferation  
327 medium consisting of RPMI, B27 supplement (Thermo Fisher, cat# 17504044) for another 4  
328 days. Beating of iPSC-differentiated cardiomyocytes (hiPSC-CMs) was typically observed  
329 between days 8–12 of differentiation. Influenza virus infections were performed on cultured in  
330 which beating cardiomyocyte cell clusters could be visually observed. For all infections of  
331 primary cells, virus was added directly to culture media and infection was allowed to proceed for  
332 24-48 h.

333

#### 334 *ELISA*

335 IFN $\beta$  and IL-6 concentrations in organ homogenates were analyzed using mouse DuoSet ELISA  
336 kits (R&D Systems).

337

#### 338 *Electrocardiography*

339 For subsurface electrocardiograph (ECG) recordings, anesthesia was provided by isoflurane in  
340 oxygen at a flow rate of 1.0 L/min. Mice were placed in a prone position on a heated pad to  
341 maintain body temperature, and subcutaneous electrodes were placed under the skin (lead II  
342 configuration). ECGs were recorded for five minutes on a Powerlab 4/30 (AD Instruments).  
343 Anesthesia was maintained for the duration of the reading. ECG traces were analyzed using  
344 LabChart 8 Pro software (AD Instruments).

345

#### 346 *Immunohistochemistry*

347 For immunohistochemistry, hearts were fixed in 10% formalin and maintained at 4°C until  
348 embedded in paraffin. Hearts were sectioned by the OSU Comparative Pathology and Mouse

349 Phenotyping Shared Resource. Masson's trichrome staining was used to identify fibrotic  
350 replacement of cardiac tissue. Digital images of heart sections were generated using Aperio  
351 ImageScope software (Leica Biosystems). Images were analyzed via ImageJ (Version 2.0.0) as  
352 previously described <sup>29</sup>.

353

#### 354 **Author Contributions**

355 Experiments were conceived by ADK, JSY, RAL, JM, MVSR, and CC. Experiments were  
356 performed by ADK, LZ, AZ, PJD, CC, HZ, AE, JK, LD, FA, and NVM. Design and rescue of  
357 miRNA-targeted viruses was performed by SA, CG, and RAL. Data was analyzed by ADK,  
358 MVSR, NK, CC, and JSY. The manuscript was written by ADK and JSY with editorial input from  
359 all authors.

360

#### 361 **Acknowledgments**

362 This research was supported by NIH Grants AI130110, AI151230, and AI142256 to JSY, grant  
363 AI146252 to MVSR, grants AI148669 and AI132962, grant HL154001 to JSY and FA, and grant  
364 AI146690 to JSY and MVSR. ADK was supported by The Ohio State University Systems and  
365 Integrative Biology Training Program funded by NIH Grant GM068412 and The Ohio State  
366 University Presidential Fellowship. AZ and AE were supported by an Ohio State University  
367 Infectious Diseases Institute training grant funded by NIH Grant AI112542 and The Ohio State  
368 University College of Medicine. AZ was also funded by the National Science Foundation GRFP  
369 Fellowship.

370

371

372

373

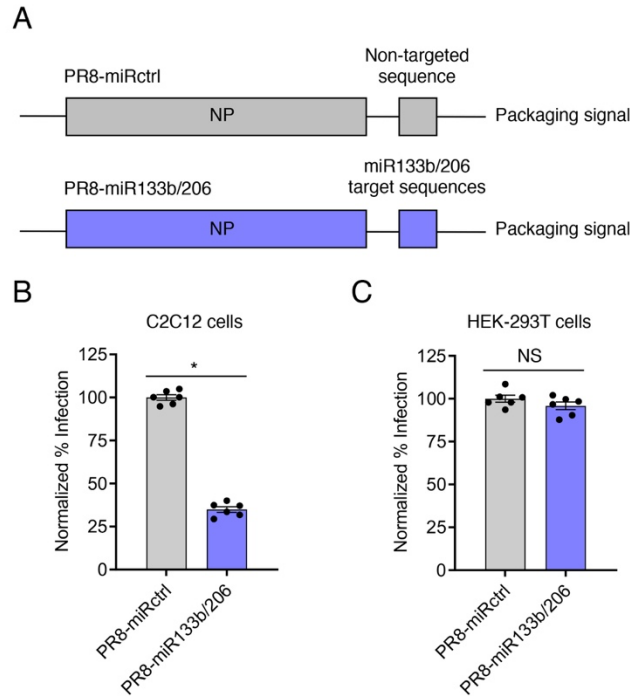

374

375 **Figure 1: PR8-miR133b/206 is attenuated in myoblast cells *in vitro*.** (A) Schematic of  
376 miRNA targeting strategy. Target sequences of two miRNAs expressed in cardiac cells,  
377 miR133b and miR206, or a length-matched random sequence were inserted into the influenza A  
378 PR8 NP gene, along with a duplicated NP packaging sequence, to generate replication  
379 competent virus with heart-specific attenuation (PR8-miR133b/206) or control virus (PR8-  
380 miRctrl). (B) C2C12 cells or (C) HEK-293T cells were infected with PR8-miR133b/206 or PR8-  
381 miRctrl for 24 h at an MOI of 2.5, and percent infection was determined by flow cytometry.  
382 Graphs represent normalized infection values. \*  $p < 0.05$  by unpaired t test; NS, not significant.

383

384

385

386

387



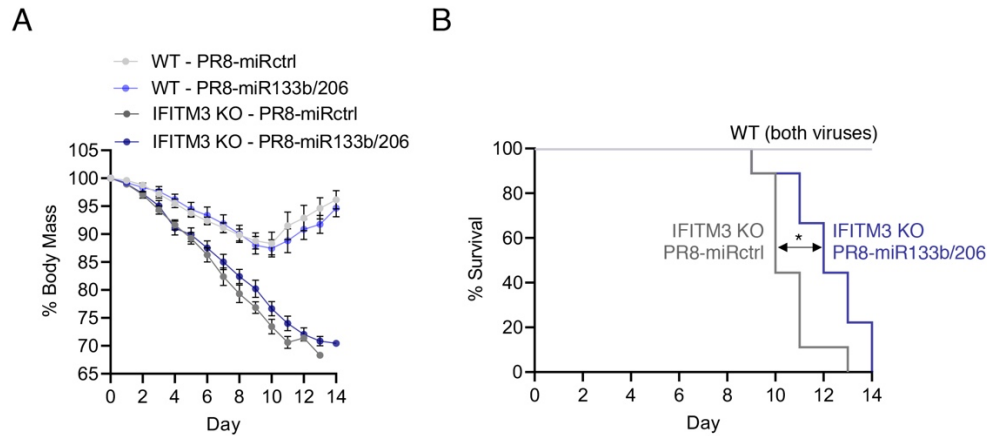

388

389 **Figure 2: Cardiac infection with influenza virus decreases mean survival time in IFITM3**  
390 **KO mice.** WT and IFITM3 KO mice were intranasally infected with PR8-miR133b/206 or PR8-  
391 miRctrl (50 TCID<sub>50</sub>) and monitored daily for **(A)** weight loss and **(B)** survival. **(A)** Points depict  
392 mean values collected from at least 3 experiments, and error bars represent standard deviation  
393 of the mean. Differences between WT and KO mouse weights were significant from day 4  
394 onward with  $p < 0.05$  by ANOVA with Tukey's multiple comparisons test. Differences in weight  
395 loss when comparing PR8-miRctrl and PR8-miR133b/206 within the individual mouse  
396 genotypes were not significant. **(B)** Survival curves. The indicated p value is for statistical  
397 comparison of the IFITM3 KO survival curves (shown by double arrow) as calculated using a  
398 Gehan-Breslow-Wilcoxon test.

399

400

401

402

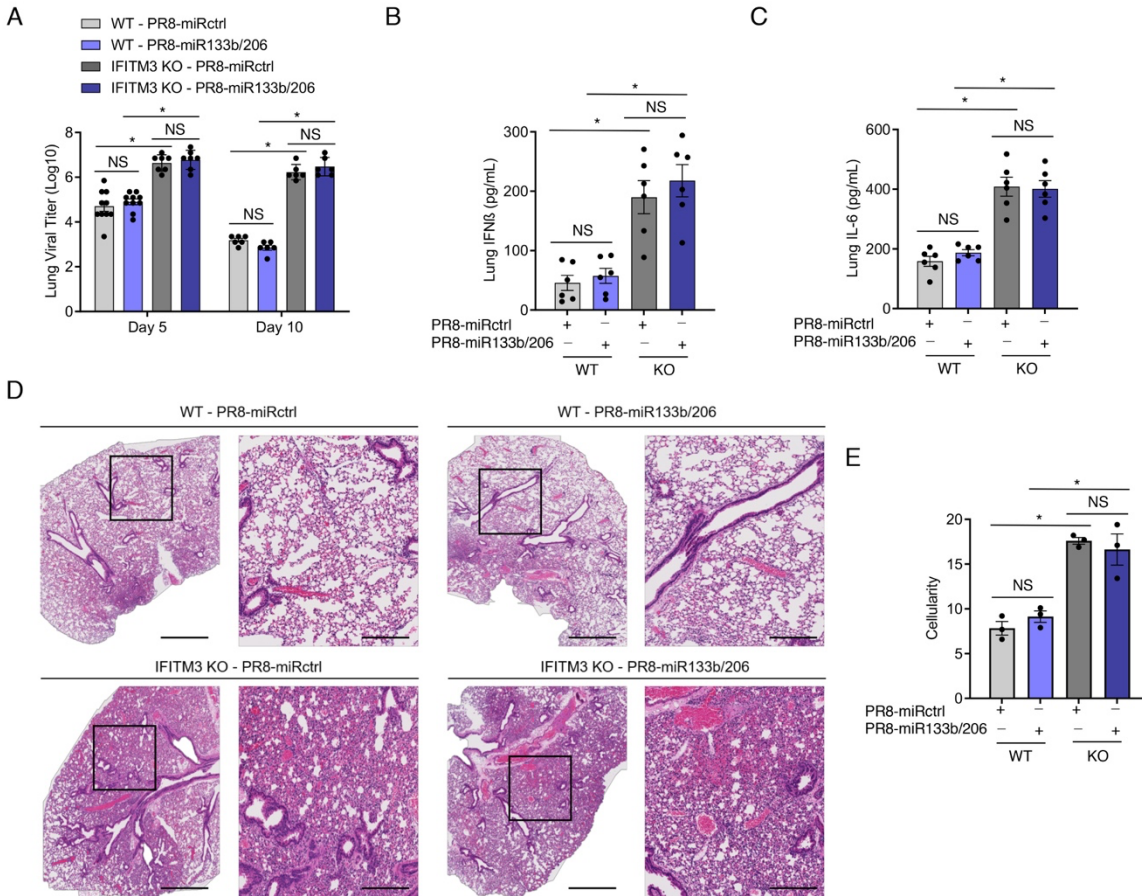

403

404

405 **Figure 3: PR8-miR133b/206 is fully pathogenic in the lungs *in vivo*.** WT and IFITM3 KO  
406 mice were intranasally infected with PR8-miR133b/206 or PR8-miRctrl (dose 50 TCID<sub>50</sub>). **(A-C)**  
407 Mice were euthanized on day 5 or 10 post-infection for measurement of virus titers **(A)** or ELISA  
408 quantification of IFN $\beta$  **(B)** and IL-6 **(C)** in the heart. Data points represent individual mice and  
409 bars represent mean values. Error bars depict standard deviation of the mean. Data points are  
410 from 3 independent experiments. Comparisons were analyzed by ANOVA followed by Tukey's  
411 post-hoc test. \*  $p < 0.05$ . **(D)** Mice were euthanized on day 10 post-infection for histological  
412 analysis of lung pathology. Boxed regions in the left image correspond to the magnified area  
413 depicted in the right image for each group. Scale bars represent 1mm and 400um for the left  
414 and right images, respectively. **(E)** Whole lung images as in D were quantified for overall  
415 cellularity using ImageJ. Data points represent individual mouse lung images and bars  
416 represent mean values. Error bars depict standard deviation of the mean. Comparisons were  
417 analyzed by ANOVA followed by Tukey's post-hoc test. \*  $p < 0.05$ .  
418

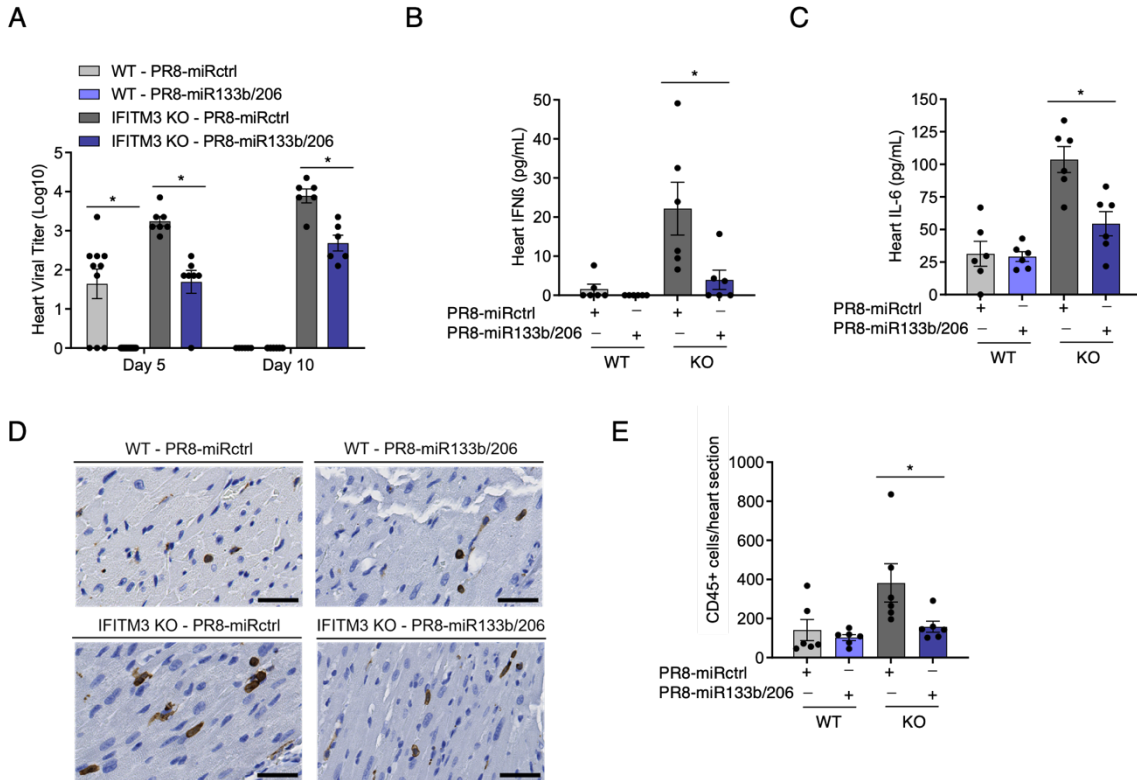

419  
420

421 **Figure 4: PR8-miR133b/206 is attenuated in the heart *in vivo*.** WT and IFITM3 KO mice  
 422 were intranasally infected with PR8-miR133b/206 or PR8-miRctrl (dose 50 TCID<sub>50</sub>). **(A-C)** Mice  
 423 were euthanized on day 5 or 10 post-infection for TCID<sub>50</sub> measurement of virus titers **(D)** or  
 424 ELISA quantification of IFN $\beta$  **(B)** and IL-6 **(C)** and in the heart. Data points represent individual  
 425 mice and bars represent mean values. Error bars depict standard deviation of the mean. Data  
 426 points are from 3 independent experiments. Statistical comparisons were analyzed by ANOVA  
 427 followed by Tukey's post-hoc test. \*p < 0.05. **(D)** Mice were euthanized on day 10 post-infection  
 428 for histological analysis of CD45+ immune cell infiltration in the heart. Images shown depict  
 429 areas of immune cell infiltration indicated by brown staining. Scale bars represent 50 $\mu$ m. **(E)**  
 430 Whole heart images were quantified for CD45+ cells using ImageJ. Data points represent  
 431 individual mouse heart images and bars represent mean values. Error bars depict standard  
 432 deviation of the mean. Comparisons were analyzed by ANOVA followed by Tukey's post-hoc  
 433 test. \* p < 0.05.

434  
435

436

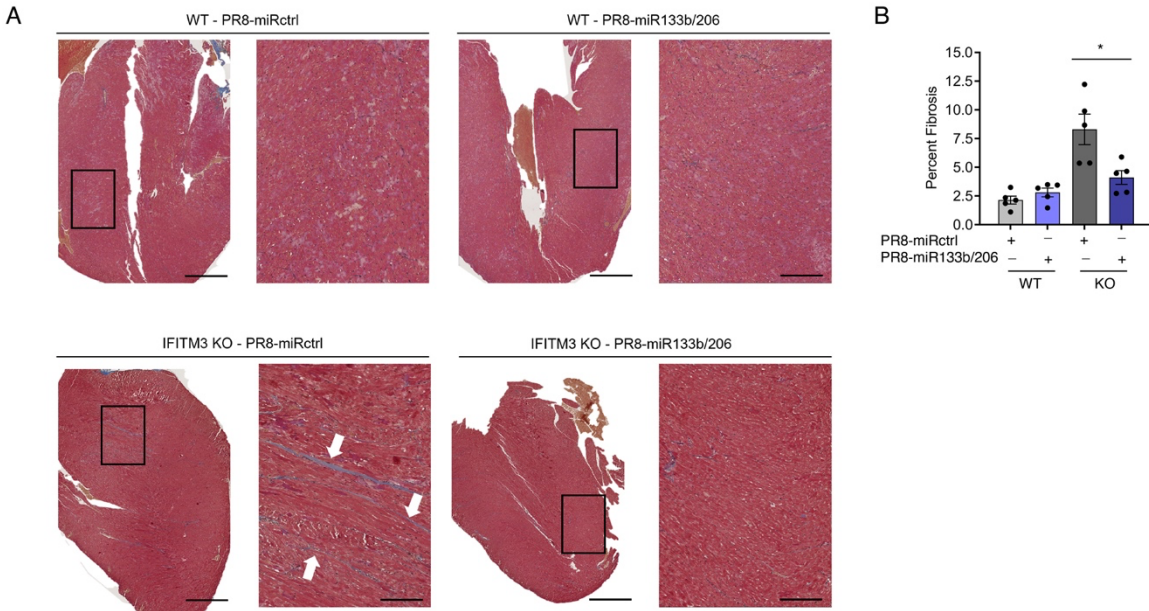

437

438 **Figure 5: Virus replication in the heart is necessary to induce fibrosis during infection.**  
439 WT and IFITM3 KO mice were intranasally infected with PR8-miR133b/206 or PR8-miRctrl (50  
440 TCID<sub>50</sub>). **(A)** Hearts were collected on day 10 post-infection, and sections were stained with  
441 Masson's trichrome stain, in which blue staining is indicative of fibrotic collagen deposition.  
442 Histological processing and image acquisition were performed by the OSU Comparative  
443 Pathology and Mouse Phenotyping Core Facility on heart tissue samples provided by Adam  
444 Kenney. A representative heart section is shown for each genotype-virus combination. Boxed  
445 areas are regions magnified in the far-right images. **(B)** Percent fibrosis was calculated by  
446 quantifying ratio of blue pixel intensity to total pixel intensity for each heart section. Each point  
447 represents a heart from an individual mouse, and bars represent mean values. Error bars  
448 represent standard deviation of the mean. Comparisons were analyzed by ANOVA followed by  
449 Tukey's post-hoc test. \*p < 0.05.

450

451

452

453

454

455

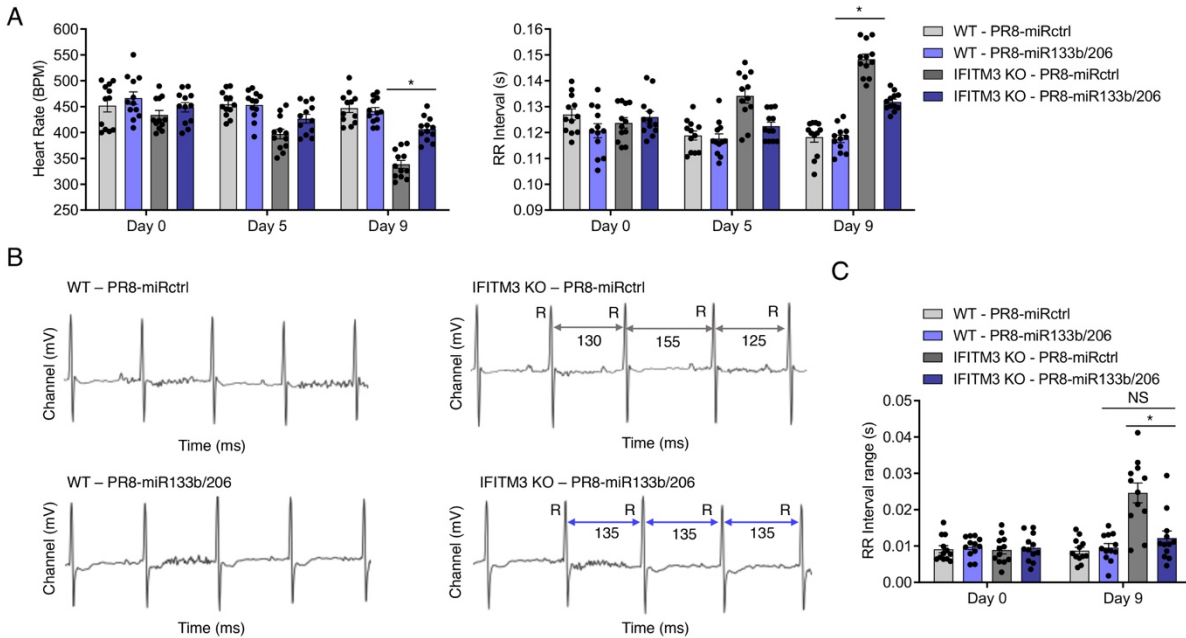

456

457

458 **Figure 6: Virus replication in the heart drives cardiac dysfunction during infection.** WT  
459 and IFITM3 KO mice were intranasally infected with PR8-miR133b/206 or PR8-miRctrl (50  
460 TCID<sub>50</sub>). **(A)** ECG measurements over the time course of infection. Data were collected over at  
461 least 3 independent experiments. Each point represents an individual mouse, and bars  
462 represent mean values. Error bars represent standard deviation of the mean. Comparisons  
463 were analyzed by ANOVA followed by Tukey's post-hoc test. \*p < 0.05. **(B)** Example ECG  
464 readings from each genotype-virus combination. Selected RR intervals of the infected KO mice  
465 are highlighted by grey (PR8-miRctrl) or purple (PR8-miR133b/206) double arrows. **(C)** RR  
466 interval ranges, defined as the difference between the longest and shortest RR intervals over an  
467 ECG measurement period of 5 minutes, were calculated for individual mice on day 9 post-  
468 infection. Each point represents an individual mouse, and bars represent mean values. Error  
469 bars represent standard deviation of the mean. Comparisons were analyzed by ANOVA  
470 followed by Tukey's post-hoc test. \*p < 0.05.

471

472

473

474

475

476

477





493 **References**

- 494 1. Molinari, N.A., *et al.* The annual impact of seasonal influenza in the US: measuring  
495 disease burden and costs. *Vaccine* **25**, 5086-5096 (2007).
- 496 2. Fedson, D.S. Influenza, evolution, and the next pandemic. *Evol Med Public Health* **2018**,  
497 260-269 (2018).
- 498 3. Bailey, E.S., *et al.* The continual threat of influenza virus infections at the human-animal  
499 interface: What is new from a one health perspective? *Evol Med Public Health* **2018**,  
500 192-198 (2018).
- 501 4. Estabragh, Z.R. & Mamas, M.A. The cardiovascular manifestations of influenza: a  
502 systematic review. *Int J Cardiol* **167**, 2397-2403 (2013).
- 503 5. Ukimura, A., Satomi, H., Ooi, Y. & Kanzaki, Y. Myocarditis Associated with Influenza A  
504 H1N1pdm2009. *Influenza Res Treat* **2012**, 351979 (2012).
- 505 6. Chacko, B., *et al.* Cardiac manifestations in patients with pandemic (H1N1) 2009 virus  
506 infection needing intensive care. *J Crit Care* **27**, 106 e101-106 (2012).
- 507 7. Corrales-Medina, V.F., Madjid, M. & Musher, D.M. Role of acute infection in triggering  
508 acute coronary syndromes. *Lancet Infect Dis* **10**, 83-92 (2010).
- 509 8. Sellers, S.A., Hagan, R.S., Hayden, F.G. & Fischer, W.A., 2nd. The hidden burden of  
510 influenza: A review of the extra-pulmonary complications of influenza infection. *Influenza*  
511 *Other Respir Viruses* **11**, 372-393 (2017).
- 512 9. Wang, J., *et al.* Cardiac complications associated with the influenza viruses A subtype  
513 H7N9 or pandemic H1N1 in critically ill patients under intensive care. *Braz J Infect Dis*  
514 **21**, 12-18 (2017).
- 515 10. Chow, E.J., *et al.* Acute Cardiovascular Events Associated With Influenza in Hospitalized  
516 Adults : A Cross-sectional Study. *Ann Intern Med* **173**, 605-613 (2020).
- 517 11. Kodama, M. Influenza myocarditis. *Circ J* **74**, 2060-2061 (2010).
- 518 12. Karjalainen, J., Nieminen, M.S. & Heikkila, J. Influenza A1 myocarditis in conscripts.  
519 *Acta Med Scand* **207**, 27-30 (1980).
- 520 13. Ukimura, A., Ooi, Y., Kanzaki, Y., Inomata, T. & Izumi, T. A national survey on  
521 myocarditis associated with influenza H1N1pdm2009 in the pandemic and postpandemic  
522 season in Japan. *J Infect Chemother* **19**, 426-431 (2013).
- 523 14. Oseasohn, R., Adelson, L. & Kaji, M. Clinicopathologic study of thirty-three fatal cases of  
524 Asian influenza. *N Engl J Med* **260**, 509-518 (1959).
- 525 15. Paddock, C.D., *et al.* Myocardial injury and bacterial pneumonia contribute to the  
526 pathogenesis of fatal influenza B virus infection. *J Infect Dis* **205**, 895-905 (2012).
- 527 16. Ukimura, A., Izumi, T., Matsumori, A. & Clinical Research Committee on Myocarditis  
528 Associated with Influenza, A.P.i.J.o.b.J.C.S. A national survey on myocarditis associated  
529 with the 2009 influenza A (H1N1) pandemic in Japan. *Circ J* **74**, 2193-2199 (2010).
- 530 17. Lucke, B., Wight, T. & Kime, E. Pathologic anatomy and bacteriology of influenza:  
531 Epidemic of autumn, 1918. *Archives of Internal Medicine* **24**, 154-237 (1919).
- 532 18. Udell, J.A., *et al.* Association between influenza vaccination and cardiovascular  
533 outcomes in high-risk patients: a meta-analysis. *JAMA* **310**, 1711-1720 (2013).
- 534 19. Sperling, L.S., Albert, M.A. & Koppaka, R. Disparities in Influenza Vaccination-  
535 Opportunity to Extend Cardiovascular Prevention to Millions of Hearts. *JAMA Cardiol* **6**,  
536 11-12 (2021).
- 537 20. Kobasa, D., *et al.* Aberrant innate immune response in lethal infection of macaques with  
538 the 1918 influenza virus. *Nature* **445**, 319-323 (2007).
- 539 21. Witzleb, W., Witzleb, H., Mehlhorn, J., Sprossig, M. & Wutzler, P. Demonstration of  
540 influenza virus A in human heart by semiquantitative virus assay and  
541 immunofluorescence. *Acta Virol* **20**, 168 (1976).

- 542 22. Cioc, A.M. & Nuovo, G.J. Histologic and in situ viral findings in the myocardium in cases  
543 of sudden, unexpected death. *Mod Pathol* **15**, 914-922 (2002).
- 544 23. Ray, C.G., Icenogle, T.B., Minnich, L.L., Copeland, J.G. & Grogan, T.M. The Use of  
545 Intravenous Ribavirin to Treat Influenza Virus-Associated Acute Myocarditis. *Journal of*  
546 *Infectious Diseases* **159**, 829-836 (1989).
- 547 24. Bowles, N.E., *et al.* Detection of viruses in myocardial tissues by polymerase chain  
548 reaction: Evidence of adenovirus as a common cause of myocarditis in children and  
549 adults. *J Am Coll Cardiol* **42**, 466-472 (2003).
- 550 25. Tschope, C., *et al.* Myocarditis and inflammatory cardiomyopathy: current evidence and  
551 future directions. *Nat Rev Cardiol* **18**, 169-193 (2021).
- 552 26. Fislava, T., *et al.* Multiorgan distribution of human influenza A virus strains observed in a  
553 mouse model. *Arch Virol* **154**, 409-419 (2009).
- 554 27. Kotaka, M., Kitaura, Y., Deguchi, H. & Kawamura, K. Experimental influenza A virus  
555 myocarditis in mice. Light and electron microscopic, virologic, and hemodynamic study.  
556 *Am J Pathol* **136**, 409-419 (1990).
- 557 28. Filgueiras-Rama, D., *et al.* Human influenza A virus causes myocardial and cardiac-  
558 specific conduction system infections associated with early inflammation and premature  
559 death. *Cardiovasc Res* **117**, 876-889 (2021).
- 560 29. Kenney, A.D., *et al.* IFITM3 protects the heart during influenza virus infection. *Proc Natl*  
561 *Acad Sci U S A* **116**, 18607-18612 (2019).
- 562 30. Zani, A. & Yount, J.S. Antiviral protection by IFITM3 in vivo. *Current Clinical Microbiology*  
563 *Reports* **5**, 229-237 (2018).
- 564 31. Kenney, A.D., *et al.* Human Genetic Determinants of Viral Diseases. *Annu Rev Genet*  
565 **51**, 241-263 (2017).
- 566 32. Everitt, A.R., *et al.* IFITM3 restricts the morbidity and mortality associated with influenza.  
567 *Nature* **484**, 519-523 (2012).
- 568 33. Allen, E.K., *et al.* SNP-mediated disruption of CTCF binding at the IFITM3 promoter is  
569 associated with risk of severe influenza in humans. *Nat Med* **23**, 975-983 (2017).
- 570 34. Wang, Z., *et al.* Early hypercytokinemia is associated with interferon-induced  
571 transmembrane protein-3 dysfunction and predictive of fatal H7N9 infection. *Proc Natl*  
572 *Acad Sci U S A* **111**, 769-774 (2014).
- 573 35. Lee, N., *et al.* IFITM3, TLR3, and CD55 Gene SNPs and Cumulative Genetic Risks for  
574 Severe Outcomes in Chinese Patients With H7N9/H1N1pdm09 Influenza. *J Infect Dis*  
575 **216**, 97-104 (2017).
- 576 36. Zhang, Y.H., *et al.* Interferon-induced transmembrane protein-3 genetic variant rs12252-  
577 C is associated with severe influenza in Chinese individuals. *Nature Communications*  
578 **4**(2013).
- 579 37. Bailey, C.C., Huang, I.C., Kam, C. & Farzan, M. Ifitm3 limits the severity of acute  
580 influenza in mice. *PLoS Pathog* **8**, e1002909 (2012).
- 581 38. Langlois, R.A., Varble, A., Chua, M.A., Garcia-Sastre, A. & tenOever, B.R.  
582 Hematopoietic-specific targeting of influenza A virus reveals replication requirements for  
583 induction of antiviral immune responses. *Proc Natl Acad Sci U S A* **109**, 12117-12122  
584 (2012).
- 585 39. Langlois, R.A., *et al.* MicroRNA-based strategy to mitigate the risk of gain-of-function  
586 influenza studies. *Nat Biotechnol* **31**, 844-847 (2013).
- 587 40. Fay, E.J., *et al.* Engineered Small-Molecule Control of Influenza A Virus Replication. *J*  
588 *Virology* **93**(2019).
- 589 41. Brown, B.D., *et al.* Endogenous microRNA can be broadly exploited to regulate  
590 transgene expression according to tissue, lineage and differentiation state. *Nat*  
591 *Biotechnol* **25**, 1457-1467 (2007).



- 592 42. Perez, J.T., *et al.* MicroRNA-mediated species-specific attenuation of influenza A virus.  
593 *Nat Biotechnol* **27**, 572-576 (2009).
- 594 43. Hoffmann, E., Neumann, G., Kawaoka, Y., Hobom, G. & Webster, R.G. A DNA  
595 transfection system for generation of influenza A virus from eight plasmids. *Proc. Natl.*  
596 *Acad. Sci. U. S. A.* **97**, 6108-6113 (2000).
- 597 44. He, F., *et al.* Coxsackievirus B3 engineered to contain microRNA targets for muscle-  
598 specific microRNAs displays attenuated cardiotropic virulence in mice. *J Virol* **89**, 908-  
599 916 (2015).
- 600 45. Groves, H.T., Higham, S.L., Moffatt, M.F., Cox, M.J. & Tregoning, J.S. Respiratory Viral  
601 Infection Alters the Gut Microbiota by Inducing Inappetence. *mBio* **11**(2020).
- 602 46. Swiergiel, A.H., Smagin, G.N. & Dunn, A.J. Influenza virus infection of mice induces  
603 anorexia: comparison with endotoxin and interleukin-1 and the effects of indomethacin.  
604 *Pharmacol Biochem Behav* **57**, 389-396 (1997).
- 605 47. Konsman, J.P., Parnet, P. & Dantzer, R. Cytokine-induced sickness behaviour:  
606 mechanisms and implications. *Trends Neurosci* **25**, 154-159 (2002).
- 607 48. Segura, A.M., Frazier, O.H. & Buja, L.M. Fibrosis and heart failure. *Heart Fail Rev* **19**,  
608 173-185 (2014).
- 609 49. Maanja, M., *et al.* Diffuse Myocardial Fibrosis Reduces Electrocardiographic Voltage  
610 Measures of Left Ventricular Hypertrophy Independent of Left Ventricular Mass. *J Am*  
611 *Heart Assoc* **6**(2017).
- 612 50. Van Eeden, S., Leipsic, J., Paul Man, S.F. & Sin, D.D. The relationship between lung  
613 inflammation and cardiovascular disease. *Am J Respir Crit Care Med* **186**, 11-16 (2012).
- 614 51. Madjid, M., Naghavi, M., Litovsky, S. & Casscells, S.W. Influenza and cardiovascular  
615 disease: a new opportunity for prevention and the need for further studies. *Circulation*  
616 **108**, 2730-2736 (2003).
- 617 52. Naghavi, M., *et al.* Influenza infection exerts prominent inflammatory and thrombotic  
618 effects on the atherosclerotic plaques of apolipoprotein E-deficient mice. *Circulation* **107**,  
619 762-768 (2003).
- 620 53. Chesarino, N.M., *et al.* IFITM3 requires an amphipathic helix for antiviral activity. *EMBO*  
621 *Rep* **18**, 1740-1751 (2017).
- 622 54. Lin, T.Y., *et al.* Amphotericin B increases influenza A virus infection by preventing  
623 IFITM3-mediated restriction. *Cell Rep* **5**, 895-908 (2013).
- 624 55. Desai, T.M., *et al.* IFITM3 restricts influenza A virus entry by blocking the formation of  
625 fusion pores following virus-endosome hemifusion. *PLoS Pathog* **10**, e1004048 (2014).
- 626 56. Guo, X., *et al.* Interferon-Induced Transmembrane Protein 3 Blocks Fusion of Diverse  
627 Enveloped Viruses by Altering Mechanical Properties of Cell Membranes. *ACS Nano*  
628 (2021).
- 629 57. Li, K., *et al.* IFITM proteins restrict viral membrane hemifusion. *PLoS Pathog* **9**,  
630 e1003124 (2013).
- 631 58. Chan, R.W., *et al.* Tissue tropism of swine influenza viruses and reassortants in ex vivo  
632 cultures of the human respiratory tract and conjunctiva. *J Virol* **85**, 11581-11587 (2011).
- 633 59. Chan, M.C., *et al.* Tropism and innate host response of the 2009 pandemic H1N1  
634 influenza virus compared with related swine influenza viruses and reassortants in ex vivo  
635 and in vitro cultures of the human respiratory tract and conjunctiva. *Influenza Other*  
636 *Respir Viruses* **5**, 54-55 (2011).
- 637 60. Nicholls, J.M., *et al.* Tropism of avian influenza A (H5N1) in the upper and lower  
638 respiratory tract. *Nat Med* **13**, 147-149 (2007).
- 639 61. Tundup, S., *et al.* Endothelial cell tropism is a determinant of H5N1 pathogenesis in  
640 mammalian species. *PLoS Pathog* **13**, e1006270 (2017).

- 641 62. Li, S., Schulman, J., Itamura, S. & Palese, P. Glycosylation of neuraminidase determines  
642 the neurovirulence of influenza A/WSN/33 virus. *J Virol* **67**, 6667-6673 (1993).
- 643 63. Perez, J.T., Garcia-Sastre, A. & Manicassamy, B. Insertion of a GFP reporter gene in  
644 influenza virus. *Curr Protoc Microbiol* **Chapter 15**, Unit 15G 14 (2013).
- 645 64. Manicassamy, B., *et al.* Analysis of in vivo dynamics of influenza virus infection in mice  
646 using a GFP reporter virus. *Proc Natl Acad Sci U S A* **107**, 11531-11536 (2010).
- 647 65. Accornero, F., *et al.* BEX1 is an RNA-dependent mediator of cardiomyopathy. *Nat*  
648 *Commun* **8**, 1875 (2017).
- 649 66. Geng, B.C., *et al.* A simple, quick, and efficient CRISPR/Cas9 genome editing method  
650 for human induced pluripotent stem cells. *Acta Pharmacol Sin* **41**, 1427-1432 (2020).
- 651 67. Zhao, M.T., *et al.* Molecular and functional resemblance of differentiated cells derived  
652 from isogenic human iPSCs and SCNT-derived ESCs. *Proc Natl Acad Sci U S A* **114**,  
653 E111111-e11120 (2017).
- 654  
655  
656  
657  
658  
659  
660
